# Supplementary material for: The Flux-Based PIN Allocation Mechanism Can Generate Either Canalyzed or Diffuse Distribution Patterns Depending on Geometry and Boundary Conditions
Source: PubMed Central journal article supplement (PMC3557273; doi:10.1371/journal.pone.0054802), 2013-01-28
Supplement: pone.0054802.s002.pdf [file pone.0054802.s002.pdf]

## Supporting Information Text S2

### Super-linear expansion

Here we derive a result suggesting that a feedback exponent greater than one is sufficient to generate polar-out behaviour.

We take  $\sigma = 1 + \epsilon$ ,

$$\frac{dP}{dt} = \kappa J^{1+\epsilon} + \alpha_P - \beta_P P, \quad (\text{S1})$$

and the reader is reminded that we have set  $J_{ref} = 1$ . We expand  $J^{1+\epsilon}$  in  $\epsilon$  to get

$$J^{1+\epsilon} = J \exp \epsilon \ln J = J(1 + \epsilon \ln J + O((\epsilon \ln J)^2)). \quad (\text{S2})$$

The relevant dynamics occur away from  $J \approx 0$  so we can also expand the  $\ln$  term around  $\frac{J}{J_{ref}} = 1$ ,

$$\ln J \approx (J - 1) - \frac{1}{2}(J - 1)^2 + \dots. \quad (\text{S3})$$

$J_{ref}$  clearly indicates the flux level above which taking a superlinear exponent of  $\frac{J}{J_{ref}}$  will increase it, but decrease it otherwise. Substituting in these expansions, keeping only leading order terms, and taking PIN-mediated flux to be the dominant contribution, we get

$$\frac{dP}{dt} = \kappa(\epsilon(\gamma_P A P)^2 + A(1 - \epsilon)\gamma_P P) + \alpha_P - \beta_P P, \quad (\text{S4})$$

which is quadratic, *i.e.* of the same form as equations (S1) except for the  $\kappa A(1 - \epsilon)\gamma_P P$  term. Repeating Feugier's analysis with this equation would not be meaningful since the  $\ln$  expansion is only valid around

$$\gamma_P A P \simeq 1. \quad (\text{S5})$$

The additional term can be neglected when

$$\gamma_P A \ll \beta_P, \quad (\text{S6})$$

in equation (S4). The condition (S5) then requires that  $P$  be very large, corresponding to the higher  $P$  value in the polar-out high  $r$  limit. Importantly, (S4) then reduces to equation (3) where  $\kappa \rightarrow \kappa\epsilon$ , indicating that if the conditions (S5,S6) hold then the PIN can be expected to evolve as in the quadratic case but with a weaker  $\kappa$ .
